# Supplementary material for: Exploring Antimicrobial Peptides Efficacy against Fire Blight (Erwinia amylovora)
Source: MDPI journal article supplement (doi:10.3390/plants12010113), 2022-12-26

**Supplementary Table S1.** Results of the spot tests for the nine antimicrobial peptides used against *Erwinia amylovora*.

| Peptide       | Code  | 1 mM | 500 $\mu$ M | 250 $\mu$ M | 100 $\mu$ M | 50 $\mu$ M | 25 $\mu$ M | 12.5 $\mu$ M |
|---------------|-------|------|-------------|-------------|-------------|------------|------------|--------------|
| Ascaphin-8    | GF-19 | +    | +           | +           | +           | +          | -          | -            |
| DASamP1       | FF-13 | +    | +           | +           | -           | -          | -          | -            |
| DASamP2       | IL-14 | +    | +           | +           | +           | +          | -          | -            |
| Lycotoxin I   | IL-25 | +    | +           | +           | +           | -          | -          | -            |
| Maculatin 1.3 | GF-21 | +    | +           | +           | -           | -          | -          | -            |
| Piscidin 1    | FG-22 | +    | +           | +           | +           | +          | -          | -            |
| 1036          | VK-13 | +    | +           | +           | -           | -          | -          | -            |
| BP178         | KL-29 | +    | +           | +           | +           | +          | +          | -            |
| RIJK2         | RV-12 | +    | +           | +           | -           | -          | -          | -            |

+: Clear plaque formation; -: no plaque formation.

**Supplementary Table S2.** The statistical analysis consisted of counting the coloured spots (green: SYTO9 and red: PI) in the different channels of 10 replicas for the two concentrations of each antimicrobial peptide and the relative percentages of viable cells is calculated. The histogram shows the % of cells inhibition.

|         | 250 µM |     | 50 µM |     |
|---------|--------|-----|-------|-----|
|         | SYTO9  | PI  | SYTO9 | PI  |
| KL29    | 74     | 746 | 0     | 993 |
| IL14    | 123    | 132 | 35    | 192 |
| FG22    | 228    | 237 | 97    | 253 |
| GF19    | 108    | 62  | 90    | 115 |
|         |        |     |       |     |
| CONTROL | 325    | 10  |       |     |
|         | SYTO9  | PI  |       |     |

|         | % of viability |       |
|---------|----------------|-------|
|         | 250 µM         | 50 µM |
| KL29    | 9              | 0     |
| IL14    | 48             | 15    |
| FG22    | 49             | 28    |
| GF19    | 64             | 44    |
| CONTROL | 97             |       |

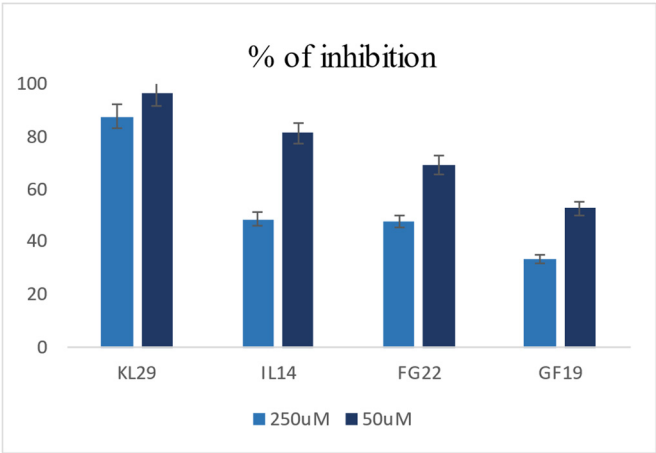

Supplement: s1 [file s1]
